# Supplementary material
Source: PubMed Central journal article supplement (PMC4836376)
Supplement: supp_fj.201500180_Supplemental_Table1.pdf [file supp_fj.201500180_Supplemental_Table1.pdf]

**Supplementary Table 1. Chemical structures and data for CFTR activators.**

| Class | Compound                  | Structure | EC50 (nM) | Vmax | ΔPD (mV)    |
|-------|---------------------------|-----------|-----------|------|-------------|
| A     | CFTR <sub>act</sub> -A043 |           | 332       | 89%  | -8.6 ± 0.49 |
| B     | CFTR <sub>act</sub> -B018 |           | 685       | 86%  | -2.5 ± 0.43 |
| B     | CFTR <sub>act</sub> -B074 |           | 340       | 93%  | -9.9 ± 0.99 |
| B     | CFTR <sub>act</sub> -B089 |           | 377       | 91%  | -3.4 ± 0.53 |
| B     | CFTR <sub>act</sub> -B156 |           | 571       | 93%  | -3.1 ± 1.1  |
| E     | CFTR <sub>act</sub> -E053 |           | 385       | 94%  | -4.1 ± 1.0  |
| J     | CFTR <sub>act</sub> -J027 |           | 138       | 90%  | -9.1 ± 0.39 |

|   |                           |                                                                                     |     |      |                 |
|---|---------------------------|-------------------------------------------------------------------------------------|-----|------|-----------------|
| K | CFTR <sub>act</sub> -K032 | 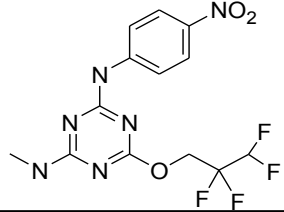   | 70  | 97%  | $-10 \pm 1.1$   |
| K | CFTR <sub>act</sub> -K089 |    | 251 | 93%  | $-8.5 \pm 0.81$ |
| O | CFTR <sub>act</sub> -O018 |    | 752 | 93%  | $-5.7 \pm 1.8$  |
| O | CFTR <sub>act</sub> -O037 |   | 513 | 82%  |                 |
| Q | CFTR <sub>act</sub> -Q022 |  | 802 | 90%  |                 |
| Q | CFTR <sub>act</sub> -Q86  |  | 640 | 93%  |                 |
| R | CFTR <sub>act</sub> -R014 |  | 21  | 100% | $-14 \pm 0.42$  |

|   |                           |                                                                                     |     |      |  |
|---|---------------------------|-------------------------------------------------------------------------------------|-----|------|--|
| R | CFTR <sub>act</sub> -R053 | 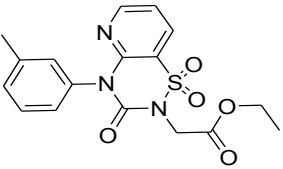   | 399 | 98%  |  |
| R | CFTR <sub>act</sub> -R088 |    | 379 | 95%  |  |
| R | CFTR <sub>act</sub> -R101 |    | 174 | 94%  |  |
| R | CFTR <sub>act</sub> -R103 |   | 126 | 100% |  |
| R | CFTR <sub>act</sub> -R142 |  | 31  | 100% |  |
| R | CFTR <sub>act</sub> -R176 |  | 36  | 100% |  |
| R | CFTR <sub>act</sub> -R185 |  | 35  | 94%  |  |

|  |         |                                                                                   |          |     |                 |
|--|---------|-----------------------------------------------------------------------------------|----------|-----|-----------------|
|  | ref. 27 | 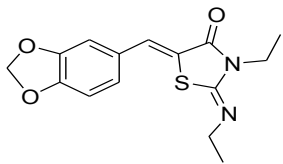 | 2000     | 65% | $-2.5 \pm 0.38$ |
|  | ref. 27 |  | 400      | 49% | $-7.4 \pm 0.90$ |
|  | VX-770  |  | Variable | 39% | $-1.8 \pm 0.29$ |

Compounds identified in primary and analog screening were grouped into 8 chemical classes.  $EC_{50}$  and  $V_{max}$  against human CFTR were determined from  $I_{sc}$  measurement on FRT-CFTR cells. 100% CFTR activation was defined as that produced by 20 mM forskolin. Measurements of ocular surface PD were performed in wild-type CD1 mice. Summary of  $\Delta PD$  produced by 1mM test compound (low  $Cl^-$  perfusate containing amiloride; mean  $\pm$  SE,  $n \geq 3$  independent experiments per activator).
